# Supplementary material for: Expression and localization of the polarity protein CRB2 in adult mouse brain: a comparison with the CRB1rd8 mutant mouse model
Source: PubMed Central journal article supplement (PMC6076319; doi:10.1038/s41598-018-30210-5), 2018-08-03
Supplement: 41598_2018_30210_MOESM1_ESM.pdf [file 41598_2018_30210_MOESM1_ESM.pdf]

# **Expression and localization of the polarity protein CRB2 in adult mouse brain: a comparison with the CRB1rd8 mutant mouse model**

**Jorge F. Dolón, Antonio E. Paniagua, Vicente Valle, Alicia Segurado, Rosario Arévalo, Almudena Velasco and Concepción Lillo\***

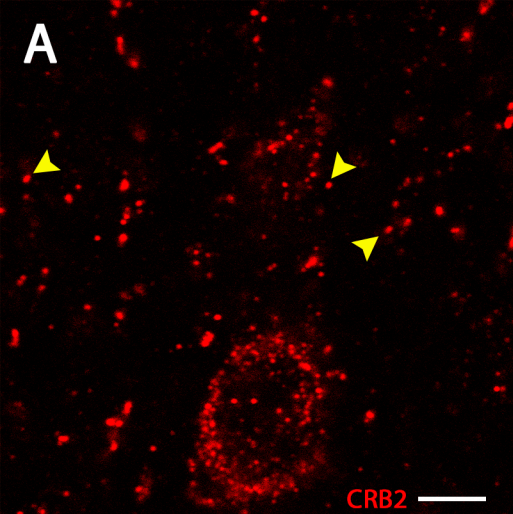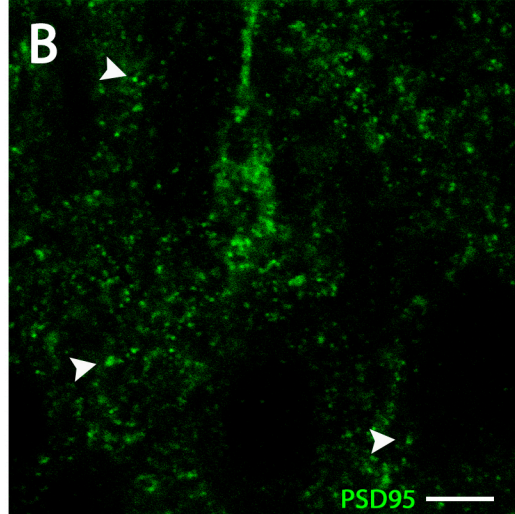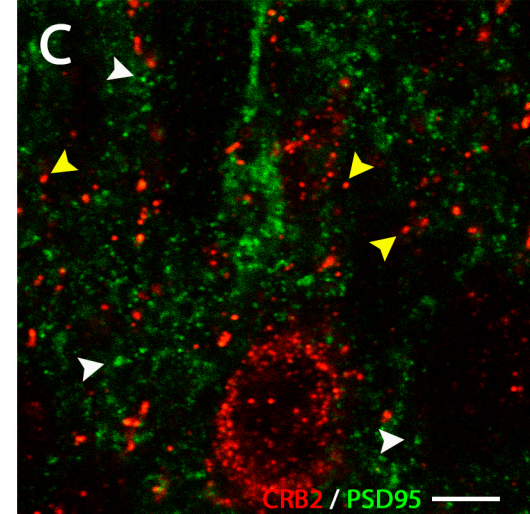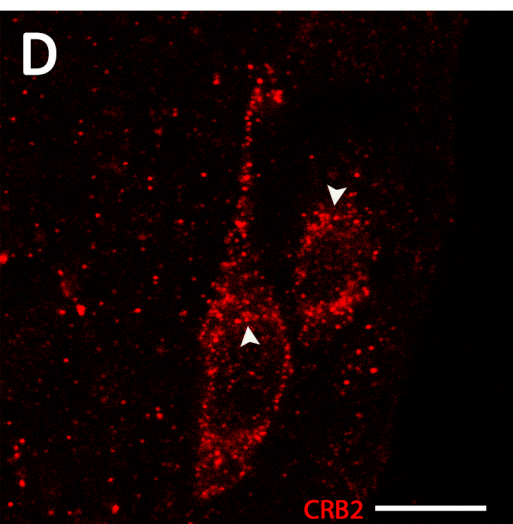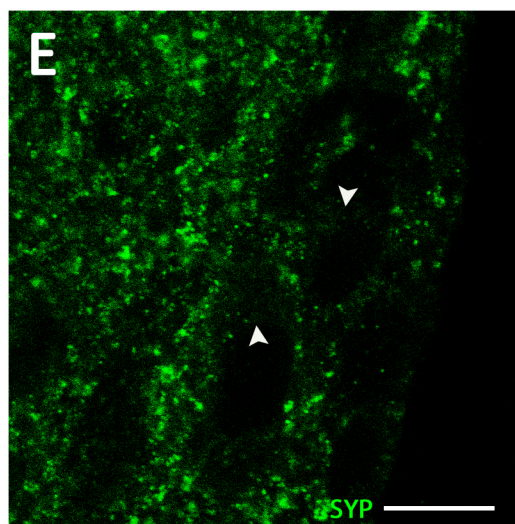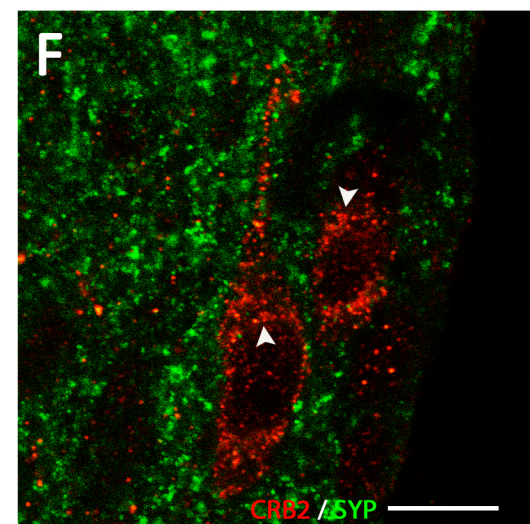

Supplementary figure 1



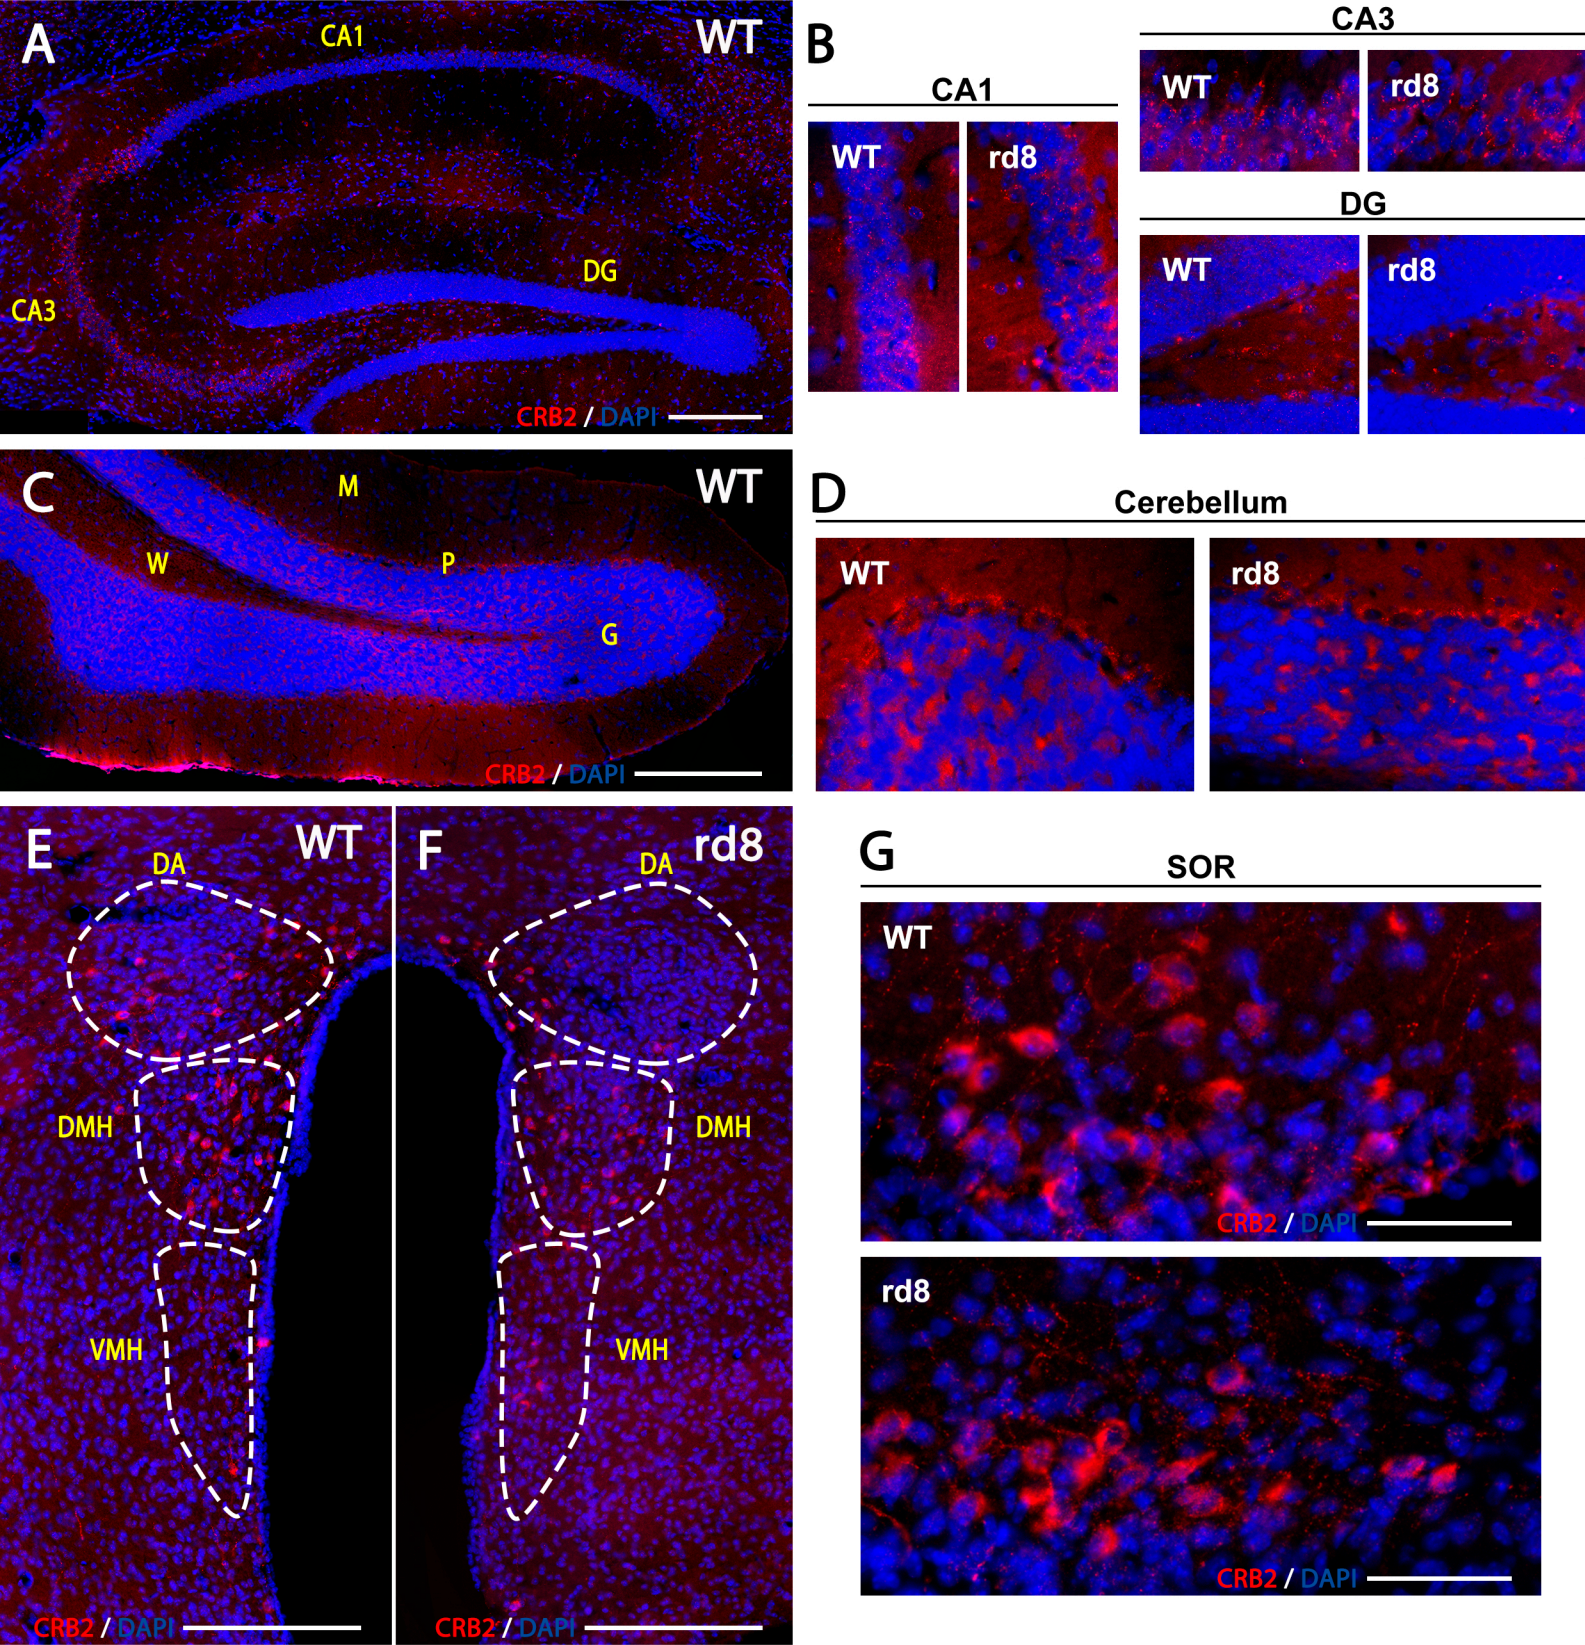

Supplementary figure 2

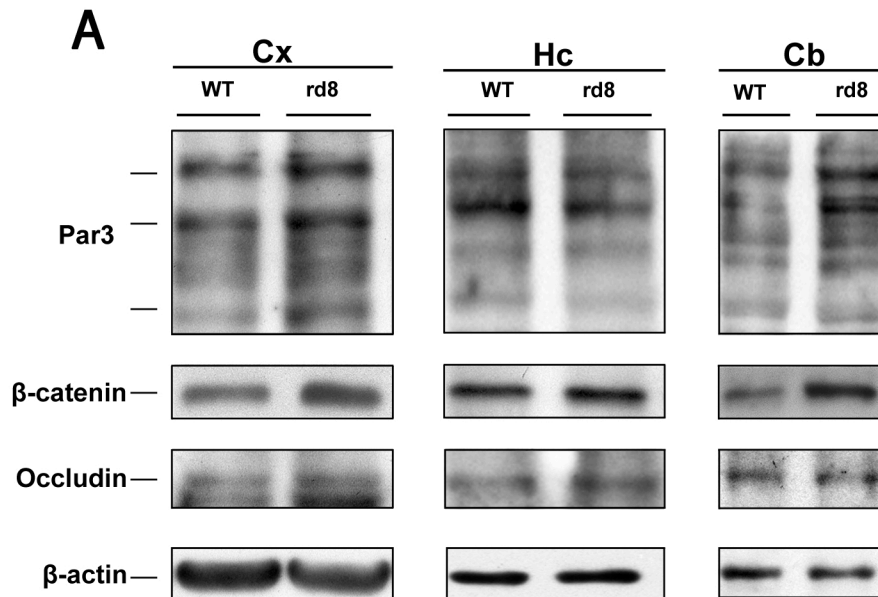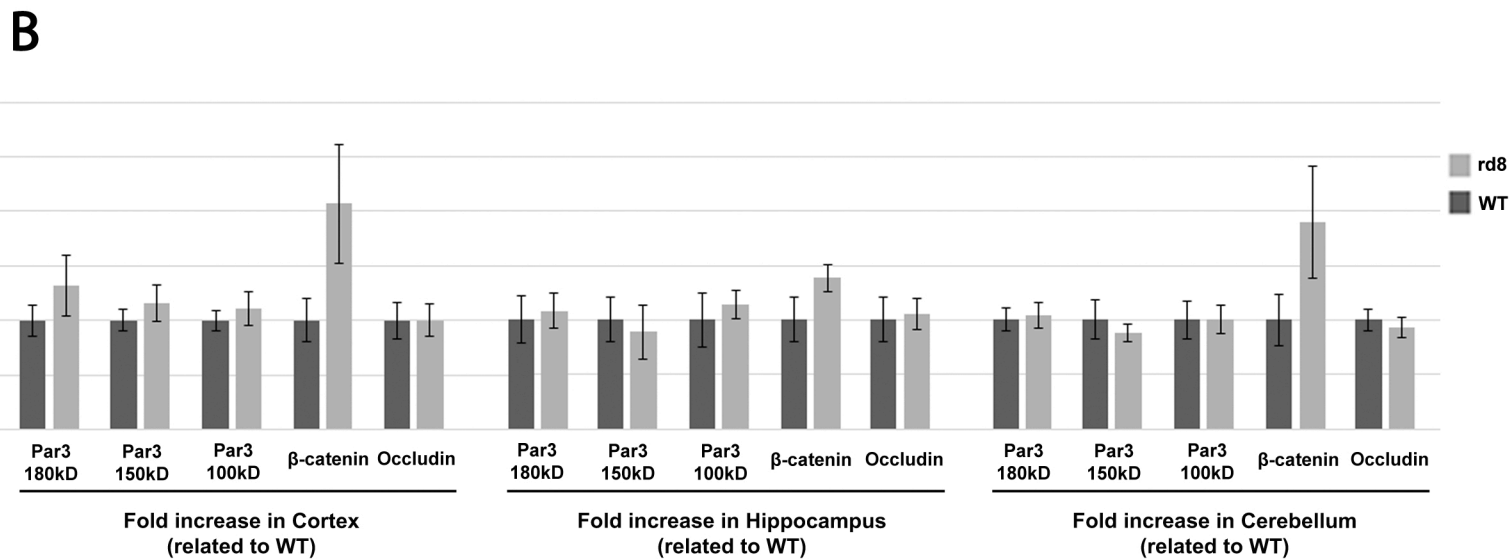

Supplementary figure 3



**A****Figure 5. E**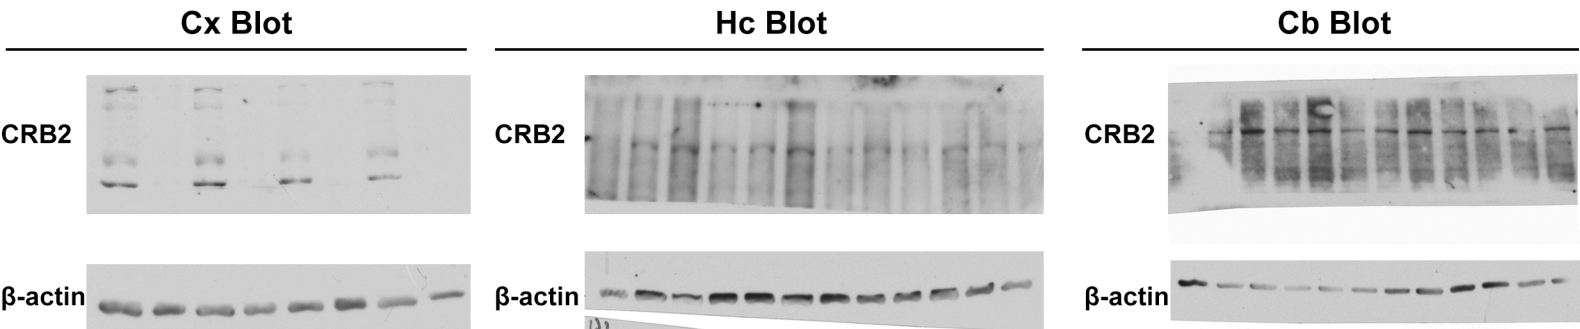**B****Supplementary figure 3 A**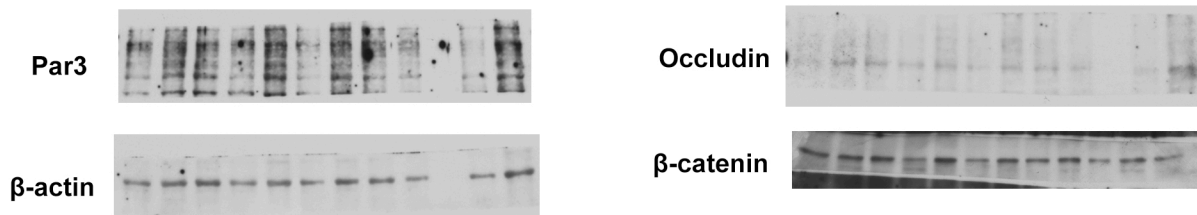**Supplementary figure 4**

**Supplementary figure 1. CRB2 and synaptic proteins in the cell bodies of neurons.** Double immunofluorescence analysis of CRB2 (A, C, D, F) and PSD95 (B, C) and SYP (E, F) in coronal sections of adult mouse PVN. In the cell bodies, CRB2 (yellow arrowheads) and PSD95 (white arrowheads) do not colocalize (A-C) and CRB2/SYP colocalization is frequent in the profiles scattered throughout the sections (Fig.4, D-F), but not in the soma of neurons (D-F). Scale bars: 5  $\mu$ m (A-C), 10  $\mu$ m (D-F).

**Supplementary figure 2. Comparative CRB2 distribution in brain.** A: Immunofluorescence of CRB2 distribution in a hippocampal sagittal section of WT adult mouse brain. B: Comparative CRB2 labeling from similar selected regions of the CA1, CA3 y DG hippocampal areas from WT and CRB1rd8 mice brain. C: Immunofluorescence of CRB2 distribution in a cerebellum sagittal section of WT adult mouse brain. D: Comparative CRB2 labeling of a selected region of the Purkinje cells' layer from WT and CRB1rd8 mice brain. E-F: Comparison of the CRB2 labeling distribution in the different hypothalamic nuclei and areas of WT (E) and CRB1rd8 (F) mice brain. G: Comparative CRB2 labeling in the SOR area of WT and CRB1rd8 mice brain. DG (dentate gyrus), M (molecular layer), P (Purkinje cells' layer), G (granular layer), W (white matter), DA (dorsal area), DMH (Dorsomedial Hypothalamic Nucleus), Ventromedial Hypothalamic Nucleus (VMH), SOR (Retrochiasmatic Supraoptic Nucleus). DAPI (in blue): nuclear labeling. Scale bars: 200  $\mu$ m (A-F), 50  $\mu$ m (G).

**Supplementary figure 3. Comparative expression of CRB2, Par3 and cell adhesion proteins in WT and CRB1rd8 mice cortex, hypothalamus and cerebellum.** A: WB analysis showing the comparative expression of Par3 (long form 180 kD, medium form 150 kD and short form 100 kD) and cell adhesion proteins (Occludin 65 kD and  $\beta$ -Catenin 92 kD) in WT and CRB1rd8 mice cortex, hypothalamus and cerebellum. B: Graph showing the comparative quantification of the proteins analyzed in A in WT and CRB1rd8 mice cortex, hypothalamus and cerebellum, respectively. Data are presented as mean  $\pm$  s.e.m.  $\beta$ -actin was used as the loading control. Data are presented as mean  $\pm$  s.e.m. Statistical information: The Kolmogorov Smirnov test was used to assess the normality of sample distribution. In B, in all cases, two experimental groups were compared with the Mann Whitney U test (n = 15). Blots were cropped from the same gel and quantitative comparisons were performed between samples of the same blot. Full-length blots are presented in Supplementary Figure 4.

**Supplementary figure 4. Originals blot of western blot experiments.** A: Some of the original blots of the WB analysis shown in Figure 5E showing the analysis of CRB2 expression in Cx, Hc and Cb. B: Some of the original blots of the WB analysis shown in Supplementary figure 3A showing the comparative expression of proteins such as Par3, Occludin and  $\beta$ -Catenin in WT and CRB1rd8 mice brain.
